# Supplementary material for: Spatial overlap links seemingly unconnected genotype-matched TB cases in rural Uganda
Source: PubMed Central journal article supplement (PMC5811029; doi:10.1371/journal.pone.0192666), 2018-02-13
Supplement: pone.0192666.s001.pdf [file pone.0192666.s001.pdf]

# TRAP TB Index Questionnaire v1 (English)

Q1. Please enter your (the interviewer's) initials: \_\_\_\_\_

Enter the date of the interview \_\_\_\_\_ / \_\_\_\_\_ / \_\_\_\_\_ (mm / dd/ yyyy)

Welcome to the TRAP TB (K23) Tororo TB Case Finding Study - INDEX CASE - Interview.

Q2. Enter the participant's Study ID: \_\_\_\_\_

Q3. For the sake of data integrity, please re-enter the Study Participant's ID

\_\_\_\_\_

|      |                  |
|------|------------------|
| 9997 | Don't Know       |
| 9998 | Refuse to Answer |
| 9999 | Not Applicable   |

**If Q2 is not equal to Q3 then READ: "The Subject IDs do not match. Please re-enter." and skip to Q3.**

Q4. At which clinic is this interview taking place? (Choose one)

|   |                                |
|---|--------------------------------|
| 1 | Tororo District Hospital (TDH) |
| 2 | TASO Tororo                    |
| 3 | CDC PREP Study (TDH Campus)    |
| 4 | St. Anthony's Hospital         |
| 5 | Bison Health Centre III        |
| 6 | Mudokori Health Centre III     |
| 9 | Not Applicable                 |

Q5. Is this participant currently an in-patient (i.e. a hospitalized patient)?

|   |                  |
|---|------------------|
| 1 | Yes              |
| 0 | No               |
| 7 | Don't Know       |
| 8 | Refuse to Answer |
| 9 | Not Applicable   |

Q6. Please enter the participant's name (Surname, First name).

\_\_\_\_\_

The following questions are to be asked directly to the participant:

Q7. How old are you?

\_\_\_\_\_

|     |                  |
|-----|------------------|
| 997 | Don't Know       |
| 998 | Refuse to Answer |

Q8. What is your date of birth?

\_\_\_\_/\_\_\_\_/\_\_\_\_

|      |                         |
|------|-------------------------|
| 2097 | Don't Know (Year)       |
| 2098 | Refuse to Answer (Year) |
| 2099 | Not Applicable (Year)   |

- Q9. Please enter the participant's gender:
- |   |                  |
|---|------------------|
| 1 | Male             |
| 2 | Female           |
| 7 | Don't Know       |
| 8 | Refuse to Answer |
| 9 | Not Applicable   |

Q10. What is the highest level of education you have completed? (Choose one)

- |    |                     |
|----|---------------------|
| 00 | No school           |
| 01 | P1 - P6             |
| 02 | P7                  |
| 03 | S1 - S3             |
| 04 | S4                  |
| 05 | S5                  |
| 06 | S6                  |
| 07 | Tertiary/Vocational |
| 08 | University          |
| 09 | Post-graduate       |
| 77 | Don't Know          |
| 88 | Refuse to Answer    |

Q11. What is your marital status? (Choose one)

- |    |                    |
|----|--------------------|
| 1  | Single             |
| 2  | Married            |
| 3  | Widowed            |
| 4  | Divorced/Separated |
| 88 | Refuse to Answer   |

Q12. What is your occupation? (Choose one)

- |    |                                                |
|----|------------------------------------------------|
| 00 | Unemployed                                     |
| 01 | Farmer                                         |
| 02 | Health Care Worker                             |
| 03 | Market Vendor                                  |
| 04 | Shopkeeper                                     |
| 05 | Bar owner                                      |
| 06 | Transport driver (truck, taxi, boda-boda, bus) |
| 07 | Teacher                                        |
| 08 | Student                                        |
| 09 | Other occupation                               |
| 77 | Don't Know                                     |
| 88 | Refuse to Answer                               |

**If Q12 is not equal to 9, then skip to Q14.**

Q13. Please enter employment description for "other" occupation.

-----

- Q14. Where do you live within Tororo Municipality? (Choose one)
- |   |                  |
|---|------------------|
| 1 | Central TMC      |
| 2 | Amogoro A or B   |
| 3 | Nyangole/Kasoli  |
| 4 | Agururu A or B   |
| 5 | Bison/Maguria    |
| 7 | Don't Know       |
| 8 | Refuse to Answer |
| 9 | Not Applicable   |
- Q15. For how long have you lived in Tororo Municipality? (Choose one)
- |   |                 |
|---|-----------------|
| 0 | All of my life. |
| 1 | Other           |

**If Q15 is equal to 0, then skip to Q17.**

- Q16. Select the length of time the participant has been living in Tororo Municipality. (Choose one)
- |    |                  |
|----|------------------|
| 1  | 1 - 2 Months     |
| 2  | 3 - 5 Months     |
| 3  | 6 - 12 Months    |
| 4  | 1 - 2 Years      |
| 5  | 3 - 5 Years      |
| 6  | >5 Years         |
| 77 | Don't Know       |
| 88 | Refuse to Answer |

- Q17. Where were you born? (Choose one)
- |    |                                                |
|----|------------------------------------------------|
| 01 | Tororo Municipality (TMC)                      |
| 02 | Tororo District, not TMC                       |
| 03 | Kampala                                        |
| 04 | Other Ugandan District (not Kampala or Tororo) |
| 05 | Kenya                                          |
| 06 | Rwanda                                         |
| 07 | Tanzania                                       |
| 08 | Ethiopia                                       |
| 09 | Sudan (North or South)                         |
| 10 | Congo                                          |
| 11 | Somalia                                        |
| 12 | Other                                          |
| 77 | Don't Know                                     |
| 88 | Refuse to Answer                               |

**If Q17 is not equal to 12, then skip to Q19.**

- Q18. Please enter the other place of birth:

-----

- Q19. What is your ethnicity? (Choose one)
- |    |                  |
|----|------------------|
| 01 | Ateso            |
| 02 | Jopadhola        |
| 03 | Ganda            |
| 04 | Soga             |
| 05 | Samia            |
| 06 | Gishu            |
| 07 | Other            |
| 97 | Don't Know       |
| 98 | Refuse to Answer |

**If Q19 is not equal to 7, then skip to Q21.**

Q20. Enter participants ethnicity: \_\_\_\_\_

- Q21. Have you ever lived outside of Tororo Municipality for more than 1 year?
- |   |                  |
|---|------------------|
| 1 | Yes              |
| 0 | No               |
| 7 | Don't Know       |
| 8 | Refuse to Answer |

- Q22. Have you ever stayed outside of Tororo Municipality for >1 month in the past year?
- |   |                  |
|---|------------------|
| 1 | Yes              |
| 0 | No               |
| 7 | Don't Know       |
| 8 | Refuse to Answer |

**If Q22 is not equal to 1, then skip to instruction before Q24.**

- Q23. For how long were you outside of Tororo Municipality in the past year? (Choose one)
- |    |                  |
|----|------------------|
| 1  | 1 - 2 Months     |
| 2  | 3 - 5 Months     |
| 3  | 6 - 11 Months    |
| 4  | >11 Months       |
| 77 | Don't Know       |
| 88 | Refuse to Answer |

The next section of questions will address the presence or absence of symptoms for the participant.

- Q24. Have you had any fever in the past week?
- |   |                  |
|---|------------------|
| 1 | Yes              |
| 0 | No               |
| 7 | Don't Know       |
| 8 | Refuse to Answer |

**If Q24 is not equal to 1, then skip to Q26.**

Q25. For how long have you had a fever? (Choose one)

|   |                  |
|---|------------------|
| 1 | <1 Week          |
| 2 | 1 - 2 Weeks      |
| 3 | 3 - 4 Weeks      |
| 4 | 1 - 2 Months     |
| 5 | 3 - 4 Months     |
| 6 | > 4 Months       |
| 7 | Don't Know       |
| 8 | Refuse to Answer |

Q26. Do you have a cough?

|   |                  |
|---|------------------|
| 1 | Yes              |
| 0 | No               |
| 7 | Don't Know       |
| 8 | Refuse to Answer |

**If Q26 is not equal to 1, then skip to Q29.**

Q27. For how long have you had a cough? (Choose one)

|    |                  |
|----|------------------|
| 0  | < 2 Weeks        |
| 1  | 2 - 4 Weeks      |
| 2  | 1 - 2 Months     |
| 3  | 3 - 4 Months     |
| 4  | > 4 Months       |
| 77 | Don't Know       |
| 88 | Refuse to Answer |

Q28. Have you had any blood in the mucous (sputum) you cough up?

|   |                  |
|---|------------------|
| 1 | Yes              |
| 0 | No               |
| 7 | Don't Know       |
| 8 | Refuse to Answer |

Q29. Are you having sweats at night?

|   |                  |
|---|------------------|
| 1 | Yes              |
| 0 | No               |
| 7 | Don't Know       |
| 8 | Refuse to Answer |

**If Q29 is not equal to 1, then skip to Q31.**

Q30. For how long have you been having sweats at night? (Choose one)

|    |                  |
|----|------------------|
| 1  | < 1 Week         |
| 2  | 1 - 2 Weeks      |
| 3  | 3 - 4 Weeks      |
| 4  | 1 - 2 Months     |
| 5  | 3 - 4 Months     |
| 6  | > 4 Months       |
| 77 | Don't Know       |
| 88 | Refuse to Answer |

- Q31. Have you lost any weight in the past 3 months?
- |   |                  |
|---|------------------|
| 1 | Yes              |
| 0 | No               |
| 7 | Don't Know       |
| 8 | Refuse to Answer |
- Q32. For how long have you been feeling sick? (Choose one)
- |    |                   |
|----|-------------------|
| 0  | I don't feel ill. |
| 1  | < 1 Week          |
| 2  | 1 - 2 Weeks       |
| 3  | 3 - 4 Weeks       |
| 4  | 1 - 2 Months      |
| 5  | 3 - 4 Months      |
| 6  | >4 Months         |
| 77 | Don't Know        |
| 88 | Refuse to Answer  |

The next set of questions will ask about the participant's medical history.

- Q33. Have you ever been diagnosed with TB (prior to your current TB diagnosis)?
- |   |                  |
|---|------------------|
| 1 | Yes              |
| 0 | No               |
| 7 | Don't Know       |
| 8 | Refuse to Answer |

**If Q33 is not equal to 1, then skip to Q38.**

- Q34. When were you diagnosed with TB in the past?
- |             |                         |
|-------------|-------------------------|
| __ __ __ __ | yyyy                    |
| 2097        | Don't Know (Year)       |
| 2098        | Refuse to Answer (Year) |
| 2099        | Not Applicable (Year)   |

- Q35. Have you ever received treatment (pills) for TB in the past?
- |   |                  |
|---|------------------|
| 1 | Yes              |
| 0 | No               |
| 7 | Don't Know       |
| 8 | Refuse to Answer |

**If Q35 is not equal to 1, then skip to Q38.**

- Q36. Have you ever started TB pills (antibiotic treatment) in the past and completed the full 8 month course of treatment?
- |   |                  |
|---|------------------|
| 1 | Yes              |
| 0 | No               |
| 7 | Don't Know       |
| 8 | Refuse to Answer |

Q37. Have you ever started TB pills (antibiotic treatment) in the past but failed to complete the full 8 month course (defaulted)?

- 1 Yes
- 0 No
- 7 Don't Know
- 8 Refuse to Answer

Q38. Have you ever smoked tobacco regularly?

- 1 Yes
- 0 No
- 7 Don't Know
- 8 Refuse to Answer

**If Q38 is not equal to 1, then skip to Q40.**

Q39. Do you currently smoke tobacco?

- 1 Yes
- 0 No
- 7 Don't Know
- 8 Refuse to Answer

Q40. How often do you have a drink containing alcohol? (Choose one)

- 0 Never
- 1 Monthly or less
- 2 2 - 4 Times per month
- 3 2 - 3 Times per week
- 4 4 or more times per week
- 77 Don't Know
- 88 Refuse to Answer

**If Q40 is equal to 0, then skip to Q43.**

Q41. How many standard drinks containing alcohol do you have on a typical day, when drinking? (Choose one)

- 0 1 or 2 Drinks
- 1 3 or 4 Drinks
- 2 5 or 6 Drinks
- 3 7 - 9 Drinks
- 4 10 or more Drinks
- 77 Don't Know
- 88 Refuse to Answer

Q42. How often do you have six or more drinks on one occasion? (Choose one)

- 0 Never
- 1 Less than monthly
- 2 Monthly
- 3 Weekly
- 4 Daily, or almost daily
- 77 Don't Know
- 88 Refuse to Answer





**If Q49 is equal to 0, then skip to Q51.**

Q50. Which of the following HIV medications are you taking? (Check all that apply)

- Tri-immune
- Combivir (AZT/3TC)
- Truvada (TDF/FTC)
- Stavudine (D4T)
- Lamivudine (3TC)
- Nevirapine (NVP)
- Efavirenz (EFV)
- Kaletra (Lopinavir/ritonavir)
- Don't Know
- Refuse to Answer
- Not Applicable

Q51. Are you taking a medication called Septrin (also known as cotrimoxazole)?

- 1 Yes
- 0 No
- 7 Don't Know
- 8 Refuse to Answer

We are now going to ask you about your home and to list the members of your household. We are interested in knowing about everyone who has lived with you in your home for at least one month in the past year.

Enter Household Names and Locations on the TRAP TB Enumeration Form.

Q52. How many rooms does your household have?

- 97 Don't Know
- 98 Refuse to Answer
- 99 Not Applicable

Q53. How many of these rooms are used for sleeping?

- 97 Don't Know
- 98 Refuse to Answer
- 99 Not Applicable

Q54. Do you live alone in your home?

- 1 Yes
- 0 No
- 7 Don't Know
- 8 Refuse to Answer
- 9 Not Applicable

Q314. Do you do any work outside of your home?

- 1 Yes
- 0 No
- 7 Don't Know
- 8 Refuse to Answer
- 9 Not Applicable
- 8 Refuse to Answer

Q405. How much time do you spend in taxis (Matatus) each week? (Choose one)

- 01 Daily taxi rides from Monday-Friday
- 02 3-4 times each week
- 03 1-2 times each week
- 04 2-3 times per month
- 05 Once per month
- 06 Less than once per month
- 07 Never
- 97 Don't Know
- 98 Refuse to Answer

Q406. How do you get around Tororo Municipality? (Check all that apply)

- By foot (walking)
- Bicycle taxi
- Boda-boda (motorcycle taxi)
- Matatu (taxi)
- Private car/motorcycle/bicycle
- Don't Know
- Refuse to Answer

The following questionnaire information should now be collected from the TB Clinic Registry. Afterwards, the participant will provide two sputum samples and be brought back to their home.

Q407. (TB Registry) What is the participant's TB treatment status? (Choose one)

- 1 New Case
- 2 Relapse
- 3 Default
- 4 Treatment Failure
- 7 Not recorded/Unknown (confirm with TB nurse)

Q408. (TB Registry) TB Registry sputum AFB Smear result (Choose one)

- 0 Smear Negative
- 1 Smear Positive
- 7 Not recorded/Unknown (Confirm with nurse)

Q409. (TB Registry) Does this patient have a diagnosis of Extrapulmonary TB? 1 Yes  
0 No

**If Q409 is equal to 0, then skip to Q412.**

Q410. (TB Registry) What is the anatomic site of extrapulmonary TB? (Choose one)

- 01 Lymph Node (adenitis)
- 02 Pleura
- 03 Meningitis (CNS TB)
- 04 Spinal
- 05 Abdominal
- 06 Uro-genital
- 07 Other
- 97 Don't Know
- 98 Refuse to Answer
- 99 Not Applicable

**If Q410 is not equal to 7, then skip to Q412.**

Q411. Enter other site of extrapulmonary TB:

-----

Q412. (TB Registry) Please enter the Chest X-ray results: (Choose one)

- 0 Normal
- 1 Abnormal (no cavity)
- 2 Abnormal with cavity
- 3 No chest x-ray done (confirm with TB nurse)

Q413. (TB Registry) What TB antibiotics are being started at this clinic visit? (Choose one)

- 1 Isoniazid(H)/ Rifampicin(R)/ Ethambutol(E)/ Pyrazinamide(Z, or PZA)
- 2 Isoniazid(H)/ Rifampicin(R)/ Ethambutol(E)/ Pyrazinamide (Z, or PZA) and Streptomycin
- 3 Other regimen
- 7 Don't Know

**If Q413 is not equal to 3, then skip to Q415.**

Q414. (TB Registry) List other antibiotic regimen started at this TB clinic visit:

-----

Q415. (TB Registry) HIV Test Result: (Choose one)

- 0 Negative
- 1 Positive
- 2 Indeterminate test result
- 3 Unknown, and HIV testing not available at TB clinic
- 8 Refuse to Answer

The TRAP TB Tororo Interview is now complete. Proceed to sputum collection.

Q416. (Question for TRAP TB Research Assistant): Was sputum collection successful? (Choose one)

- 0 No - sputum could not be collected or induced
- 1 Yes - sputum was collected without induction
- 2 Yes - sputum was collected with induction
- 3 Unable to collect - Participant refused sputum collection or induction

Please thank the participant for his/her time, and then provide him/her a ride to their home (or if they decline a ride home, determine where they live in Tororo Municipality and when you can visit their home).
