# Supplementary material for: Spatial overlap links seemingly unconnected genotype-matched TB cases in rural Uganda
Source: PubMed Central journal article supplement (PMC5811029; doi:10.1371/journal.pone.0192666), 2018-02-13
Supplement: pone.0192666.s002.pdf [file pone.0192666.s002.pdf]

# The "Tororo TB Case Finding" Study

## TB Questionnaire #2 – Index Patient

Interviewer's Initials \_\_\_\_\_

### TB Index Patient

|   | Question      | Response (fill in legibly in ink)                                                                              |
|---|---------------|----------------------------------------------------------------------------------------------------------------|
| 1 | Today's date: | $\frac{\text{_____}}{\text{(day)}} / \frac{\text{_____}}{\text{(month)}} / \frac{\text{_____}}{\text{(year)}}$ |
| 2 | Study ID:     | ___ - 00                                                                                                       |

**Section 1a. Current Household Members of Index Patient**

**Household members** are defined as people who live together (under the same physical roof) for at least 1 of the past 12 months. The only people you should include who have been there for less than 1 month are infants and newly added spouses. The head of the household is always a member and should be listed on the FIRST line, even if he or she has been there for less than 1 month. If the head of the household is the Index case, write "INDEX" under the name and cross-out the ID code.

| 1. ID Code | 2. NAME<br>(surname, given name)<br><br>If the head of the household is the Index case, write "INDEX" under the name and cross-out the ID code. | 3. Sex of NAME<br><br>[1] Male<br>[2] Female | 4. Relationship of [NAME] to Index Case<br><br>* See codes next page | 5. Current Age |                               | 6. Does [NAME] sleep in the same room as Index Case?<br><br>[0] No<br>[1] Yes |
|------------|-------------------------------------------------------------------------------------------------------------------------------------------------|----------------------------------------------|----------------------------------------------------------------------|----------------|-------------------------------|-------------------------------------------------------------------------------|
|            |                                                                                                                                                 |                                              |                                                                      | a. Years       | b. Mths<br><br>if age <2 yrs. |                                                                               |
| -01        |                                                                                                                                                 |                                              |                                                                      |                |                               |                                                                               |
| -02        |                                                                                                                                                 |                                              |                                                                      |                |                               |                                                                               |
| -03        |                                                                                                                                                 |                                              |                                                                      |                |                               |                                                                               |
| -04        |                                                                                                                                                 |                                              |                                                                      |                |                               |                                                                               |
| -05        |                                                                                                                                                 |                                              |                                                                      |                |                               |                                                                               |
| -06        |                                                                                                                                                 |                                              |                                                                      |                |                               |                                                                               |
| -07        |                                                                                                                                                 |                                              |                                                                      |                |                               |                                                                               |
| -08        |                                                                                                                                                 |                                              |                                                                      |                |                               |                                                                               |
| -09        |                                                                                                                                                 |                                              |                                                                      |                |                               |                                                                               |
| -10        |                                                                                                                                                 |                                              |                                                                      |                |                               |                                                                               |
| -11        |                                                                                                                                                 |                                              |                                                                      |                |                               |                                                                               |
| -12        |                                                                                                                                                 |                                              |                                                                      |                |                               |                                                                               |
| -13        |                                                                                                                                                 |                                              |                                                                      |                |                               |                                                                               |
| -14        |                                                                                                                                                 |                                              |                                                                      |                |                               |                                                                               |
| -15        |                                                                                                                                                 |                                              |                                                                      |                |                               |                                                                               |
| -16        |                                                                                                                                                 |                                              |                                                                      |                |                               |                                                                               |
| -17        |                                                                                                                                                 |                                              |                                                                      |                |                               |                                                                               |
| -18        |                                                                                                                                                 |                                              |                                                                      |                |                               |                                                                               |
| -19        |                                                                                                                                                 |                                              |                                                                      |                |                               |                                                                               |
| -20        |                                                                                                                                                 |                                              |                                                                      |                |                               |                                                                               |

## **Relationship of Household Members to Index Case**

2 Spouse

3 Son/Daughter

5 Father/Mother

7 Grandson/Granddaughter

9 Grandfather/Grandmother

11 Brother/Sister

13 Uncle/Aunt

15 Co-wife

16 Cousin

17 Niece/Nephew

19 Stepchild

20 Foster child

21 Girlfriend/Boyfriend

-----

30 Local Friend/Neighbor

31 Non-local Friend

32 LC chairperson

33 Househelper

34 Employee

35 Employer

36 Landlord

37 Tenant/Renter

38 Priest

40 Healthcare worker

-----

44 Other

## Section 2. Frequent (Non-Household) Contacts of Index Case

Frequent Contacts (apart from household members) are defined as people, aside from household members, with whom the Index Case has spent >12 hours in total over the past one month.

| 1. ID Code | 2. NAME<br>(surname, given name) | 3. Sex of<br>NAME<br><br>[1] Male<br>[2] Female | 4. Relationship of<br>[NAME] to Index<br>Case<br><br>* See codes below | Frequency of<br>contact:<br><br>[1] Daily<br>[2] >3 days/week<br>[3] Weekly<br>[4] Occasional<br>(Less than weekly) | Has this contact been<br>ill (losing weight,<br>coughing) or recently<br>been diagnosed or<br>treated for TB?<br><br>[0] No<br>[1] Yes<br>[9] Don't know |
|------------|----------------------------------|-------------------------------------------------|------------------------------------------------------------------------|---------------------------------------------------------------------------------------------------------------------|----------------------------------------------------------------------------------------------------------------------------------------------------------|
| -21        |                                  |                                                 |                                                                        |                                                                                                                     |                                                                                                                                                          |
| -22        |                                  |                                                 |                                                                        |                                                                                                                     |                                                                                                                                                          |
| -23        |                                  |                                                 |                                                                        |                                                                                                                     |                                                                                                                                                          |
| -24        |                                  |                                                 |                                                                        |                                                                                                                     |                                                                                                                                                          |
| -25        |                                  |                                                 |                                                                        |                                                                                                                     |                                                                                                                                                          |
| -26        |                                  |                                                 |                                                                        |                                                                                                                     |                                                                                                                                                          |
| -27        |                                  |                                                 |                                                                        |                                                                                                                     |                                                                                                                                                          |
| -28        |                                  |                                                 |                                                                        |                                                                                                                     |                                                                                                                                                          |
| -29        |                                  |                                                 |                                                                        |                                                                                                                     |                                                                                                                                                          |
| -30        |                                  |                                                 |                                                                        |                                                                                                                     |                                                                                                                                                          |
| -31        |                                  |                                                 |                                                                        |                                                                                                                     |                                                                                                                                                          |
| -32        |                                  |                                                 |                                                                        |                                                                                                                     |                                                                                                                                                          |
| -33        |                                  |                                                 |                                                                        |                                                                                                                     |                                                                                                                                                          |
| -34        |                                  |                                                 |                                                                        |                                                                                                                     |                                                                                                                                                          |
| -35        |                                  |                                                 |                                                                        |                                                                                                                     |                                                                                                                                                          |
| -36        |                                  |                                                 |                                                                        |                                                                                                                     |                                                                                                                                                          |
| -37        |                                  |                                                 |                                                                        |                                                                                                                     |                                                                                                                                                          |
| -38        |                                  |                                                 |                                                                        |                                                                                                                     |                                                                                                                                                          |
| -39        |                                  |                                                 |                                                                        |                                                                                                                     |                                                                                                                                                          |
| -40        |                                  |                                                 |                                                                        |                                                                                                                     |                                                                                                                                                          |

### RELATIONSHIP TO INDEX PATIENT CODES

|                 |                  |             |                         |                         |                |             |
|-----------------|------------------|-------------|-------------------------|-------------------------|----------------|-------------|
| 1 Spouse        | 4 Other relative | 7 Employer  | 10 Health Care Worker   | 13 Teacher              | 16 Trader      | 19 Landlord |
| 2 Mother/Father | 5 Friend         | 8 Employee  | 11 Traditional Healer   | 14 Priest               | 17 Client      | 44 Other    |
| 3 Daughter/Son  | 6 Neighbor       | 9 Co-worker | 12 Local Councilor (LC) | 15 Girlfriend/Boyfriend | 18 Househelper |             |

### Section 3a. Locations Visited by Index Case

Work Location: Defined as any place where the Index Case worked in the past three months.

Clinic Location: Defined as any place where the Index Case has gone for medical care in the past three months.

Social Location: Defined as any place where the Index Case spent **12 hours or more** in total over the **past month**.

| Location ID                                                             | 2. Name of LOCATION<br><br>(examples: “Tororo Cement Factory,” or “Prime Hotel” or “TDH Male Ward”) | 3. How often did you go to [LOCATION] in the past month?<br>[1] Daily<br>[2] 3-5 times/week<br>[3] 1-2 times/week<br>[4] Weekly<br>[5] 2-3 times/month<br>[6] Once<br>[7] I did not go to this place in the past month. | 4. When you visited [LOCATION], how much time did you spend there?<br><br>[1] >12 hours<br>[2] 8-12 hours<br>[3] 4-8 hours<br>[4] <4 hours | 5. Type of social location<br>[1] Restaurant<br>[2] Bar/Club<br>[3] Market place<br>[4] Shop<br>[5] Church/Mosque<br>[6] Hotel/Inn<br>[7] Private Residence<br>[8] Other<br>[9] Ajona or Malwa (local brew drinking circle)<br>[10] Money circle |
|-------------------------------------------------------------------------|-----------------------------------------------------------------------------------------------------|-------------------------------------------------------------------------------------------------------------------------------------------------------------------------------------------------------------------------|--------------------------------------------------------------------------------------------------------------------------------------------|--------------------------------------------------------------------------------------------------------------------------------------------------------------------------------------------------------------------------------------------------|
| <i>Category: Household location</i>                                     |                                                                                                     |                                                                                                                                                                                                                         |                                                                                                                                            |                                                                                                                                                                                                                                                  |
|                                                                         | .50                                                                                                 |                                                                                                                                                                                                                         |                                                                                                                                            |                                                                                                                                                                                                                                                  |
| <i>Category: Work Locations</i>                                         |                                                                                                     |                                                                                                                                                                                                                         |                                                                                                                                            |                                                                                                                                                                                                                                                  |
|                                                                         | .61                                                                                                 |                                                                                                                                                                                                                         |                                                                                                                                            |                                                                                                                                                                                                                                                  |
|                                                                         | .62                                                                                                 |                                                                                                                                                                                                                         |                                                                                                                                            |                                                                                                                                                                                                                                                  |
|                                                                         | .63                                                                                                 |                                                                                                                                                                                                                         |                                                                                                                                            |                                                                                                                                                                                                                                                  |
|                                                                         | .64                                                                                                 |                                                                                                                                                                                                                         |                                                                                                                                            |                                                                                                                                                                                                                                                  |
|                                                                         | .65                                                                                                 |                                                                                                                                                                                                                         |                                                                                                                                            |                                                                                                                                                                                                                                                  |
| <i>Category: Clinic Locations – “Where do you go for medical care?”</i> |                                                                                                     |                                                                                                                                                                                                                         |                                                                                                                                            |                                                                                                                                                                                                                                                  |
|                                                                         | .71                                                                                                 |                                                                                                                                                                                                                         |                                                                                                                                            |                                                                                                                                                                                                                                                  |
|                                                                         | .72                                                                                                 |                                                                                                                                                                                                                         |                                                                                                                                            |                                                                                                                                                                                                                                                  |
|                                                                         | .73                                                                                                 |                                                                                                                                                                                                                         |                                                                                                                                            |                                                                                                                                                                                                                                                  |
| <i>Category: Social Locations</i>                                       |                                                                                                     |                                                                                                                                                                                                                         |                                                                                                                                            |                                                                                                                                                                                                                                                  |
|                                                                         | .81                                                                                                 |                                                                                                                                                                                                                         |                                                                                                                                            |                                                                                                                                                                                                                                                  |
|                                                                         | .82                                                                                                 |                                                                                                                                                                                                                         |                                                                                                                                            |                                                                                                                                                                                                                                                  |
|                                                                         | .83                                                                                                 |                                                                                                                                                                                                                         |                                                                                                                                            |                                                                                                                                                                                                                                                  |
|                                                                         | .84                                                                                                 |                                                                                                                                                                                                                         |                                                                                                                                            |                                                                                                                                                                                                                                                  |
|                                                                         | .85                                                                                                 |                                                                                                                                                                                                                         |                                                                                                                                            |                                                                                                                                                                                                                                                  |
|                                                                         | .86                                                                                                 |                                                                                                                                                                                                                         |                                                                                                                                            |                                                                                                                                                                                                                                                  |
|                                                                         | .87                                                                                                 |                                                                                                                                                                                                                         |                                                                                                                                            |                                                                                                                                                                                                                                                  |
|                                                                         | .88                                                                                                 |                                                                                                                                                                                                                         |                                                                                                                                            |                                                                                                                                                                                                                                                  |
|                                                                         | .89                                                                                                 |                                                                                                                                                                                                                         |                                                                                                                                            |                                                                                                                                                                                                                                                  |
|                                                                         | .90                                                                                                 |                                                                                                                                                                                                                         |                                                                                                                                            |                                                                                                                                                                                                                                                  |
