# Supplementary material for: Spatial overlap links seemingly unconnected genotype-matched TB cases in rural Uganda
Source: PubMed Central journal article supplement (PMC5811029; doi:10.1371/journal.pone.0192666), 2018-02-13
Supplement: pone.0192666.s003.pdf [file pone.0192666.s003.pdf]

## TRAP TB Contact Screen v1 (English)

Q1. Please enter your (the interviewer's) initials: \_\_\_\_\_

Q2. Please enter the INDEX CASE Study ID: \_\_\_\_\_

Q3. To ensure data integrity, please re-enter the Index Case's ID.

\_\_\_\_\_  
9997 Don't Know  
9998 Refuse to Answer  
9999 Not Applicable

Q4. Please enter the HOUSEHOLD CONTACT's Study ID (1-20: based on the household contact enumeration form: for example, the first contact enumerated has an ID of 1; and the tenth contact enumerated has an ID of 10)

\_\_\_\_\_  
97 Don't Know

Q5. For the sake of data integrity, please re-enter the Household Contact's ID number.

\_\_\_\_\_  
97 Don't Know

Q6. Please enter the name of the Household Contact [Response to Q4]:

-----

### Section 1. TB Symptom Screening.

Q7. Do you currently have a **cough**?

|   |                  |
|---|------------------|
| 1 | Yes              |
| 0 | No               |
| 7 | Don't Know       |
| 8 | Refuse to Answer |

**If Q7 is equal to 0, then skip to Q10.**

Q8. For how much time have you had a cough? (Choose one)

|   |                  |
|---|------------------|
| 1 | <2 weeks         |
| 2 | 2-4 weeks        |
| 3 | 1-3 months       |
| 4 | 3-6 months       |
| 5 | >6 months        |
| 7 | Don't Know       |
| 8 | Refuse to Answer |

Q9. Is their blood in your sputum (mucous) when you cough?

|   |                  |
|---|------------------|
| 1 | Yes              |
| 0 | No               |
| 7 | Don't Know       |
| 8 | Refuse to Answer |
| 9 | Not Applicable   |

Q10. Have you had a **fever** in the past week?

|   |                  |
|---|------------------|
| 1 | Yes              |
| 0 | No               |
| 7 | Don't Know       |
| 8 | Refuse to Answer |

Q11. Have you **lost weight** over the past month?

|   |                  |
|---|------------------|
| 1 | Yes              |
| 0 | No               |
| 7 | Don't Know       |
| 8 | Refuse to Answer |

Q12. Are you having any sweats at night?

|   |     |
|---|-----|
| 1 | Yes |
| 0 | No  |

- 7 Don't Know
- 8 Refuse to Answer

Section 2. Household Contact Medical History

- Q13. Have you ever been diagnosed with tuberculosis (TB)?
- 1 Yes
  - 0 No
  - 7 Don't Know
  - 8 Refuse to Answer

**If Q13 is not equal to 1, then skip to Q15.**

- Q14. When were you diagnosed with tuberculosis (TB)?
- \_\_\_ / \_\_\_
- mm / yyyy
- 2097 Don't Know (Year)
  - 2098 Refuse to Answer (Year)
  - 2099 Not Applicable (Year)

- Q15. Have you ever been treated for tuberculosis (TB)?
- 1 Yes
  - 0 No
  - 7 Don't Know
  - 8 Refuse to Answer

- Q16. Have you ever smoked tobacco regularly?
- 1 Yes
  - 0 No
  - 7 Don't Know
  - 8 Refuse to Answer

**If Q16 is not equal to 1, then skip to Q18.**

- Q17. Do you currently smoke tobacco?
- 1 Yes
  - 0 No
  - 7 Don't Know
  - 8 Refuse to Answer

- Q18. Have you ever been tested for HIV?
- 1 Yes
  - 0 No
  - 7 Don't Know
  - 8 Refuse to Answer

**If Q18 is equal to 0, then skip to end of questionnaire.**

- Q19. What were the results of your most recent HIV test? (Choose one)
- 0 HIV Negative
  - 1 HIV Positive
  - 77 Don't Know
  - 88 Refuse to Answer

**If Q19 is equal to 0, then skip to end of questionnaire.**

- Q20. Are you currently in care at an HIV clinic?
- 1 Yes
  - 0 No
  - 7 Don't Know
  - 8 Refuse to Answer

**If Q20 is equal to 0, then skip to instruction before Q22.**

- Q21. At which clinic do you receive HIV care? (Choose one)
- 1 Tororo District Hospital (TDH) HIV Clinic
  - 2 TASO Tororo
  - 3 Other

- 7 Don't Know
- 8 Refuse to Answer

**If Q21 is not equal to 3, then skip to Q23.**

Q22. Enter other clinic where participant receives HIV care:

-----

Q23. Are you taking any HIV medications, other than cotrimoxazole (Septrin)?

- 1 Yes
- 0 No
- 7 Don't Know
- 8 Refuse to Answer

**If Q23 is equal to 0, then skip to end of questionnaire.**

Q24. Which of the following HIV medications are you taking? (Check all that apply)

- Tri-immune
- Combivir (AZT/3TC)
- Truvada (TDF/FTC)
- Stavudine (D4T)
- Lamivudine (3TC)
- Nevirapine (NVP)
- Efavirenz (EFV)
- Kaletra (Lopinavir/ritonavir)
- Don't Know
- Refuse to Answer
- Not Applicable

**If Q7 is equal to 1 or Q10 is equal to 1 or Q11 is equal to 1 or Q12 is equal to 1, then based on the information provided by the household contact, [Response to Q6] should be referred to a medical clinic for further TB evaluation (including sputum microscopy).**

The Household Contact interview for [Response to Q6] is now complete. Reopen a new Household Contact questionnaire to perform TB symptom screening on the next household contact of Index Case [Response to Q2]. Thank you.
